# Supplementary material
Source: PubMed Central journal article supplement (PMC4713192)
Supplement: NIHMS743623-supplement-Supplemental_text.pdf [file NIHMS743623-supplement-Supplemental_text.pdf]

**Supplemental material for:**

**Transferred interbacterial antagonism genes augment eukaryotic innate immune function**

Seemay Chou<sup>1,\*</sup>, Matthew D. Daugherty<sup>2,3,\*</sup>, S. Brook Peterson<sup>1</sup>, Jacob Biboy<sup>4</sup>, Youyun Yang<sup>5</sup>, Brandon L. Jutras<sup>6,7</sup>, Lillian K. Fritz-Laylin<sup>8</sup>, Michael A. Ferrin<sup>1</sup>, Brittany N. Harding<sup>1</sup>, Christine Jacobs-Wagner<sup>6,7,9,10</sup>, X. Frank Yang<sup>5</sup>, Waldemar Vollmer<sup>4</sup>, Harmit S. Malik<sup>2,3</sup>, and Joseph D. Mougous<sup>1,\*\*</sup>

<sup>1</sup>Department of Microbiology, University of Washington School of Medicine, Seattle, WA 98195, USA.

<sup>2</sup>Division of Basic Sciences and <sup>3</sup>Howard Hughes Medical Institute, Fred Hutchinson Cancer Research Center, Seattle, WA 98109, USA.

<sup>4</sup>Centre for Bacterial Cell Biology, Institute for Cell and Molecular Biosciences, Newcastle University, Newcastle upon Tyne, NE2 4AX, UK.

<sup>5</sup>Department of Microbiology and Immunology, Indiana University School of Medicine, Indianapolis, IN 46202, USA.

<sup>6</sup>Microbial Diversity Institute, <sup>7</sup>Howard Hughes Medical Institute, and Departments of <sup>9</sup>Microbial Pathogenesis and <sup>10</sup>Molecular, Cellular, and Developmental Biology, Yale University, New Haven, CT 06516, USA.

<sup>8</sup>Department of Cellular and Molecular Pharmacology, University of California, San Francisco, CA 94158, USA.

\* These authors contributed equally to this work.

\*\* To whom correspondence should be addressed: [mougous@u.washington.edu](mailto:mougous@u.washington.edu)

## 1 **Methods**

2

3 **Computational searches.** Homologs of *tae* were searched for using iterative PSI-BLAST<sup>29</sup>.

4 First, bacterial homologs were assembled using PSI-BLAST searches limited to bacterial se-

5 quences in the non-redundant (NR) protein database. Sequences with e-values <1e-10 (for *tae2*)

6 or <1e-20 (for *tae1*, *tae3* and *tae4*) and greater than 50% query coverage were included in suc-

7 cessive rounds until no new homologs were identified. Position-specific scoring matrix (PSSM)

8 was used to query the NR database limited to eukaryotic sequences. Eukaryotic homologs with

9 e-values <1e-5 were used to initiate an iterative PSI-BLAST search for eukaryotic proteins, as

10 described above (e-value cut-off 1e-5). Eukaryotic homologs were validated by the presence of

11 introns or flanking eukaryotic genes. To validate the *Oxytricha trifallax dae3* gene identified in

12 the macronucleus genome, we searched the unpublished micronucleus genome

13 (<http://oxy.ciliate.org/blast/>) for evidence of a fragmented *dae3* gene that would be consistent

14 with gene rearrangement in this species<sup>13</sup>. EST, whole-genome sequence (WGS) and transcrip-

15 tome databases were searched with tBlastN<sup>29</sup> using validated *dae* genes. We gratefully

16 acknowledge the deposition of unpublished data into these databases from multiple sources, in-

17 cluding Baylor College of Medicine Human Genome Sequencing Center

18 (<https://www.hgsc.bcm.edu>), The Genome Institute at Washington University School of Medi-

19 cine (<http://genome.wustl.edu>), the U.S. Geological Survey (<http://www.usgs.gov>), the Function-

20 al Genomics Center Zurich (<http://www.fgcz.ch>), the Joint Genome Institute (<http://jgi.doe.gov>)

21 and the Broad Institute (<http://www.broadinstitute.org>). Hits from EST or transcriptome data-

22 bases were accepted in cases where the hit was more closely related to a validated *dae* than a

1 bacterial *tae*. When gene predictions based on genomic sequences differed from experimental  
2 data from EST or transcriptome databases, we utilized experimental data to confirm or modify  
3 the predicted protein sequence. For instance, the predicted *dae2* from *I. scapularis*  
4 (gi|242000170) lacks a secretion signal, whereas the sequence from EST data (gi|156264544) is  
5 different in the first exon, resulting in a strongly predicted secretion signal similar to the other  
6 tick sequences.

7  
8 **Phylogenetic and evolutionary analysis.** Bacterial and eukaryotic sequences were aligned using  
9 MUSCLE<sup>30</sup> and edited using Geneious<sup>31</sup>. Regions encompassing the catalytic domain were used  
10 for phylogenetic analyses; sequences with >98% identity were excluded. The best-fitting evolu-  
11 tionary model was determined by Prottest<sup>32</sup>. Maximum likelihood phylogenetic trees were gener-  
12 ated with PhyML<sup>33</sup> using 500 bootstrap replicates. To validate phylogenetic inferences, Bayesian  
13 Markov chain Monte Carlo (MCMC) analyses were performed in MrBayes<sup>34</sup> sampling every 500  
14 generations until the standard deviation of split frequencies was <0.01 or 10<sup>6</sup> generations were  
15 sampled. Tests for purifying selection were performed on aligned and degapped nucleotide se-  
16 quences of *dae* or *tae* genes. Whole gene non-synonymous:synonymous (dN/dS) ratio calcula-  
17 tions, as well as statistical tests for purifying or positive selection for individual codons, were  
18 performed using SLAC in the HyPhy software suite<sup>35</sup>. Additional statistical tests in the HyPhy  
19 software suite (REL and FUBAR) confirmed that several *tae* and *dae* codons display statistically  
20 significant signatures of purifying selection. No codons demonstrate signatures of positive selec-  
21 tion. N-terminal eukaryotic secretion signals were predicted using SignalP<sup>36</sup> using default cut-  
22 off values. Sequence logos were constructed using Geneious.

1  
2  
3  
4  
5  
6  
7  
8  
9  
10  
11  
12  
13  
14  
15  
16  
17  
18  
19  
20  
21  
22

**DNA libraries.** For *N. gruberi* cDNA libraries, strain NEG was grown on *Klebsiella* and differentiated using standard protocols<sup>37</sup>. Synchrony was estimated by percentage of flagellates after fixing in Lugol's iodine (n>100 per time-point)<sup>38</sup>. 10<sup>7</sup> cells were harvested per sample. For *I. scapularis* cDNA libraries, ticks from the Tick-Rearing Center at Oklahoma State University, Stillwater, OK were homogenized by grinding in liquid nitrogen. RNA and DNA was purified from *I. scapularis* and *N. gruberi* samples with Trizol reagent (Invitrogen) according to the manufacturer's instructions. Contaminating genomic DNA in RNA samples was removed by treatment with Turbo DNase (Invitrogen) for one hour at 37 °C, followed by a second Trizol purification. DNA contamination was checked by PCR using actin- or GAPDH-specific primers for *I. scapularis* and *N. gruberi*, respectively. cDNA libraries were synthesized using the iScript cDNA synthesis kit (Biorad).

**Expression of Dae proteins.** The codon-optimized *dae* genes from *I. scapularis* (*dae2*), *N. gruberi* (*dae3*), and *B. floridae* (*dae4*) with predicted signal sequences removed were synthesized by Genscript and cloned into the pHis-sumo expression vector. Shuffle T7 pLysS cells were transformed with plasmids, and expression was induced at an optical density (OD<sub>600</sub>) of 0.6 with 0.1 mM isopropyl-beta-D-thiogalactopyranoside for 20 h at 18 °C. Cells resuspended in 20 mM HEPES pH 7.5, 0.5 M NaCl, 25 mM imidazole were lysed by sonication. Lysate was cleared by centrifugation for 1 h at 18,000 x g, and proteins were purified with a metal-chelating affinity column. The tag was proteolytically removed with the H3C and separated from proteins using a second affinity column and size exclusion chromatography (GE Healthcare).

1  
2 **Sacculus analysis.** PG sacculi from *E. coli* D456 ( $\Delta dacA \Delta dacB \Delta dacC$ ) were purified as previ-  
3 ously described<sup>39,40</sup>. Preparations (300  $\mu$ g) were incubated with Dae2 (1  $\mu$ M), Dae3 (10  $\mu$ M) or  
4 Dae4 (10  $\mu$ M) in 300  $\mu$ l of 20 mM HEPES pH 7.5, 100 mM NaCl for 4 h at 37 °C. PG sacculi  
5 from *B. subtilis* 168 (300  $\mu$ g) or from *S. pneumoniae* R6 (120  $\mu$ g) were incubated with Dae2 (6  
6  $\mu$ M) for 4 h at 37 °C. The samples were digested with cellosyl, reduced and analyzed by HPLC  
7 using published methods<sup>40</sup>. For preparations from *B. burgdorferi*, the B31-MI-16 strain, an  
8 infectious clone of the sequenced type strain B31, was cultured at 34 °C to early mid-log  
9 exponential growth<sup>41-43</sup>. Cultures were chilled on ice for 10 min and gently harvested by  
10 centrifugation at 3,250 x g for 15 min. Pelleted cells were washed 3 times and resuspended in  
11 cold PBS. Cell suspensions were added, drop-wise, to 6 ml of 8% SDS and boiled for 30 min.  
12 PG was prepared, incubated with Dae2 (1  $\mu$ M) for 4 h at 37 °C, and analyzed as previously  
13 described<sup>40</sup>, with the exception of HPLC buffer B, which contained 30% methanol.

14  
15 **Western Blot Analysis.** Tissues were dissected from *I. scapularis* ticks purchased from the  
16 Tick-Rearing Center at Oklahoma State University, Stillwater, OK. A rabbit polyclonal antibody  
17 specific for *I. scapularis* Dae2 was generated by GenScript using a synthetic peptide correspond-  
18 ing to Dae2 amino acids 123-136 (RYGNTGKPNYNGDN, Lot #195690-4). Mouse anti-actin  
19 antibody from Abcam (GR14272-8) and anti-Rabbit (A6154) and Anti-Mouse (A4416) horserad-  
20 ish peroxidase (HRP)-conjugated secondary antibodies from Sigma were used. Western blot  
21 analyses and imaging were performed as previously described<sup>44</sup>. Four replicate analyses of tis-  
22 sues were performed; a representative blot is shown in Figure 3a.

1  
2  
3  
4  
5  
6  
7  
8  
9  
10  
11  
12  
13  
14  
15  
16  
17  
18  
19  
20  
21  
22

**Growth curves.** *E. coli* growth curves were generated as previously described<sup>11</sup>. The vector pSCHRAB2 was used for expression of cytoplasmic *I. scapularis* Dae2, and the pSCRHAB2 vector with a *pelB* leader sequence inserted was used for expression of periplasmic Dae2. Curves are representative of three biological experiments and contain technical triplicates.

**Lysis assays.** Assays were performed as previously described<sup>45</sup>. *E. coli* reactions were carried out at enzyme concentrations of 1mM; *B. subtilis* reactions were carried out at concentrations of 1 mM (lysozyme) and 50 mM (Dae2). Curves are representative of three biological experiments and contain technical triplicates.

**Bacterial killing assays.** Colonies of *E. coli* or *B. subtilis* cells grown on solid LB media were washed in 0.2X PBS pH 6 and resuspended to an OD<sub>600</sub> of 0.1 and 0.01, respectively. Cells were incubated with recombinant Dae2 enzyme (WT or C43A) at RT for 3 hr, and serial dilutions were plated on solid LB. Viability was quantified by enumeration of colony forming units. Curves contain four technical replicates.

**Mouse and RNAi experiments.** All animal experiments and tick protocols were approved by the Institutional Animal Care and Use Committee at Indiana University. The low-passage, virulent *B. burgdorferi* strain 5A4NP1, a derivative of B31-MI, was a gift from H. Kawabata and S. Norris, University of Texas Health Science Center at Houston. The strain was cultivated in Barbour-Stoener-Kelly (BSK-II) medium supplemented with 6% normal rabbit serum (Pel Freez

1 Biologicals, Rogers, AR) at 35 °C with 5% CO<sub>2</sub>. Kanamycin was added to the culture at 300  
2 µg/ml. The mouse feeding experiments were conducted in the Vector-borne Diseases Laboratory  
3 at Indiana University School of Medicine, Indianapolis, IN. Briefly, C3H/HeN mice were nee-  
4 dle-infected with *B. burgdorferi* (10<sup>5</sup> spirochetes per mouse). Two weeks post-inoculation,  
5 mouse infection was confirmed by cultivation of ear-punch biopsy specimens to assess spiro-  
6 chaete growth. A single growth-positive culture was used as the criterion for infection of each  
7 mouse.

8 RNAi in nymphal ticks was performed using previously described protocols<sup>46</sup>. To generate dou-  
9 ble-stranded RNA (dsRNA), 374 bp of *I. scapularis dae2* and 356 bp of the green fluorescent  
10 protein gene (*gfp*) were amplified using the following primers containing the T7 promoter  
11 (*gfp*\_RNAi\_F: gagctcTAATACGACTCACTATAGGGAGAGTGTGAGTTATAGTT-  
12 GTATTCCAAT; *gfp*\_RNAi\_R: ggtaccTAATACGACTCACTATAGGGAGAGTGG-  
13 GAGGGTGAAGGTGATGCAAC; *dae2*\_RNAi\_F: ctagtcgagctcTAATACGACTCAC-  
14 TATAGGGAGACGCTCGTGGTCCTGGGAT; *dae2*\_RNAi\_R: ctagtcggtaccTAATAC-  
15 GACTCACTATAGGGAGAGTTGTAGTTGGGCTTCCTGTA). dsRNA was synthesized and  
16 purified from PCR products using a commercial kit (Megascript RNAi Kit, Ambion, Inc.), and  
17 resuspended into elution buffer (10 mM Tris-HCl pH 7, 1 mM EDTA), aliquoted, and stored into  
18 -20°C until further use.

19 RNAi experiments were performed on a randomized pool of nymphs reared from three engorged  
20 female ticks collected from the wild. Five microliters of the *dae2* or *gfp* dsRNA (3 µg/µl) was  
21 loaded into capillary tubes, and 0.5 ml dsRNA was microinjected into the gut of each unfed  
22 nymph, as recently described<sup>47</sup>. Microinjected ticks were allowed to rest in a temperature-

1 controlled humidity chamber for 16 hr and ~100 nymphs were subsequently fed on *B. burgdor-*  
2 *feri* –infected female 14-day old C3H/HeN mice. Two mice were included per RNAi treatment  
3 to account for potential variability in *B. burgdorferi* infection loads. Ticks were allowed to feed  
4 to repletion (3-5 days) and collected within 24 hours (t=0). Fed ticks were maintained in a tem-  
5 perature-controlled incubator until the indicated time point (2 weeks). Knockdown efficiency  
6 was analyzed by qRT-PCR analysis of *dae2* levels in engorged nymphs. The RNAi treatment  
7 groups were blinded from the time of dsRNA injections through qPCR analyses.

8

9 **qPCR analyses.** qPCR was performed on cDNA samples using the SsoAdvanced Universal  
10 SYBR Green Supermix (Biorad). Expression levels for *dae* genes were normalized to *actin* or  
11 *GAPDH* expression levels in *I. scapularis* and *N. gruberi*, respectively. Analyses of *dae* gene ex-  
12 pression include three technical replicates for *N. gruberi* and technical duplicates of three biolog-  
13 ical replicates for *I. scapularis*. Populations of *B. burgdorferi* and total bacteria were quantified  
14 by qPCR in tick DNA samples using primers targeted to *flaB* (*B. burgdorferi*-specific), the 16S  
15 rRNA gene<sup>48</sup>, or *trospa* (tick-specific). Biological replicates are shown for qPCR analyses of *B.*  
16 *burgdorferi* and total bacterial levels. Transcript or DNA copy numbers were calculated using a  
17 standard curve.

18

19



1

## 2 **Methods and Extended Data References**

- 3 11 Russell, A. B. *et al.* Type VI secretion delivers bacteriolytic effectors to target cells.  
4 *Nature* **475**, 343-347, doi:10.1038/nature10244 (2011).  
5
- 6 13 Swart, E. C. *et al.* The *Oxytricha trifallax* macronuclear genome: a complex eukaryotic  
7 genome with 16,000 tiny chromosomes. *PLoS Biol* **11**, e1001473,  
8 doi:10.1371/journal.pbio.1001473 (2013).
- 9 14 Jeyaprakash, A. & Hoy, M. A. First divergence time estimate of spiders, scorpions, mites  
10 and ticks (subphylum: Chelicerata) inferred from mitochondrial phylogeny. *Exp Appl*  
11 *Acarol* **47**, 1-18, doi:10.1007/s10493-008-9203-5 (2009).  
12
- 13 28 Keeling, P. J. *et al.* The tree of eukaryotes. *Trends Ecol Evol* **20**, 670-676,  
14 doi:10.1016/j.tree.2005.09.005 (2005).
- 15 29 Altschul, S. F. *et al.* Gapped BLAST and PSI-BLAST: a new generation of protein  
16 database search programs. *Nucleic acids research* **25**, 3389-3402 (1997).
- 17 30 Edgar, R. C. MUSCLE: multiple sequence alignment with high accuracy and high  
18 throughput. *Nucleic acids research* **32**, 1792-1797 (2004).
- 19 31 Kearse, M. *et al.* Geneious Basic: an integrated and extendable desktop software platform  
20 for the organization and analysis of sequence data. *Bioinformatics (Oxford, England)* **28**,  
21 1647-1649, doi:10.1093/bioinformatics/bts199 (2012).
- 22 32 Abascal, F., Zardoya, R. & Posada, D. ProtTest: selection of best-fit models of protein  
23 evolution. *Bioinformatics (Oxford, England)* **21**, 2104-2105,  
24 doi:10.1093/bioinformatics/bti263 (2005).
- 25 33 Guindon, S. *et al.* New algorithms and methods to estimate maximum-likelihood  
26 phylogenies: assessing the performance of PhyML 3.0. *Systematic biology* **59**, 307-321,  
27 doi:10.1093/sysbio/syq010 (2010).
- 28 34 Ronquist, F. & Huelsenbeck, J. P. MrBayes 3: Bayesian phylogenetic inference under  
29 mixed models. *Bioinformatics (Oxford, England)* **19**, 1572-1574 (2003).
- 30 35 Pond, S. L., Frost, S. D. & Muse, S. V. HyPhy: hypothesis testing using phylogenies.  
31 *Bioinformatics (Oxford, England)* **21**, 676-679, doi:10.1093/bioinformatics/bti079  
32 (2005).
- 33 36 Petersen, T. N., Brunak, S., von Heijne, G. & Nielsen, H. SignalP 4.0: discriminating  
34 signal peptides from transmembrane regions. *Nature methods* **8**, 785-786,  
35 doi:10.1038/nmeth.1701 (2011).

1 37 Fulton, C. Amebo-flagellates as research partners: the laboratory biology of Naegleria  
2 and Tetramitus. *Methods Cell Physiol* **4**, 341-476 (1970).

3 38 Fulton, C. & Dingle, A. D. Appearance of the flagellate phenotype in populations of  
4 Naegleria amebae. *Dev Biol* **15**, 165-191 (1967).

5 39 Edwards, D. H. & Donachie, D. W. in *Bacterial Growth and Lysis: Metabolism and*  
6 *Structure of the Bacterial Sacculus* (eds M. A. de Pedro, J. V. Holtje, & W. Löffelhardt)  
7 (Plenum Press, 1993).

8 40 Glauner, B. Separation and quantification of mucopeptides with high-performance liquid  
9 chromatography. *Anal Biochem* **172**, 451-464 (1988).

10 41 Casjens, S. *et al.* A bacterial genome in flux: the twelve linear and nine circular  
11 extrachromosomal DNAs in an infectious isolate of the Lyme disease spirochete *Borrelia*  
12 *burgdorferi*. *Molecular microbiology* **35**, 490-516 (2000).

13 42 Fraser, C. M. *et al.* Genomic sequence of a Lyme disease spirochaete, *Borrelia*  
14 *burgdorferi*. *Nature* **390**, 580-586, doi:10.1038/37551 (1997).

15 43 Jutras, B. L., Chenail, A. M. & Stevenson, B. Changes in bacterial growth rate govern  
16 expression of the *Borrelia burgdorferi* OspC and Erp infection-associated surface  
17 proteins. *Journal of bacteriology* **195**, 757-764, doi:10.1128/JB.01956-12 (2013).

18 44 Hood, R. D. *et al.* A type VI secretion system of *Pseudomonas aeruginosa* targets a toxin  
19 to bacteria. *Cell host & microbe* **7**, 25-37 (2010).

20 45 Chou, S. *et al.* Structure of a peptidoglycan amidase effector targeted to Gram-negative  
21 bacteria by the type VI secretion system. *Cell Reports* **1**, 656-664,  
22 doi:10.1016/j.celrep.2012.05.016 (2012).

23 46 Ramamoorthi, N. *et al.* The Lyme disease agent exploits a tick protein to infect the  
24 mammalian host. *Nature* **436**, 573-577, doi:10.1038/nature03812 (2005).

25 47 Pal, U. *et al.* TROSPA, an *Ixodes scapularis* receptor for *Borrelia burgdorferi*. *Cell* **119**,  
26 457-468, doi:10.1016/j.cell.2004.10.027 (2004).

27 48 Nadkarni, M. A., Martin, F. E., Jacques, N. A. & Hunter, N. Determination of bacterial  
28 load by real-time PCR using a broad-range (universal) probe and primers set.  
29 *Microbiology (Reading, England)* **148**, 257-266 (2002).  
30

31
